# Supplementary material
Source: publisher figshare collection journal article supplement (https://frontiersin.figshare.com/ndownloader/files/26419043)
Supplement: Supplementary file [file 26419043]

Spiro N, Perkins R, Kaye S, Tymoszek U, Mason-Bertrand A, Cossette I, Glasser S, and Williamon A (2021), The Effects of COVID-19 Lockdown 1.0 on Working Patterns, Income, and Wellbeing among Performing Arts Professionals in the United Kingdom (April–June 2020), *Front. Psychol.* 11:594086. doi: 10.3389/fpsyg.2020.594086.

**SUPPLEMENTARY TABLE 3 |** Changes in work profiles and social meetings, *HEartS Professional Survey*, *N*=385.

**3A. Time spent doing areas of work since the start of COVID-19**

(see Supplementary Figure 1, *HEartS Professional Survey*, question 4.4)

|                                                                           | Less time |            | No change |           | More time |            |
|---------------------------------------------------------------------------|-----------|------------|-----------|-----------|-----------|------------|
|                                                                           | <i>n</i>  | %          | <i>n</i>  | %         | <i>n</i>  | %          |
| Performing ( <i>n</i> =254)                                               | 243       | 96%        | 3         | 1%        | 8         | 3%         |
| Conducting / directing / producing ( <i>n</i> =89)                        | 80        | 90%        | 3         | 3%        | 6         | 7%         |
| Teaching / coaching / workshop leading / mentoring ( <i>n</i> =233)       | 169       | 73%        | 20        | 9%        | 44        | 19%        |
| Managing / promoting ( <i>n</i> =79)                                      | 49        | 62%        | 15        | 19%       | 15        | 19%        |
| Composing / choreographing / designing / making / writing ( <i>n</i> =94) | 47        | 50%        | 5         | 5%        | 42        | 45%        |
| Appraising / assessing / evaluating / reviewing ( <i>n</i> =86)           | 44        | 51%        | 22        | 26%       | 20        | 23%        |
| Researching ( <i>n</i> =83)                                               | 33        | 40%        | 14        | 17%       | 36        | 43%        |
| Curating / editing / presenting / technical supporting ( <i>n</i> =49)    | 26        | 53%        | 10        | 20%       | 13        | 27%        |
| Other ( <i>n</i> =62)                                                     | 43        | 69%        | 6         | 10%       | 13        | 21%        |
| <b>Average %</b>                                                          |           | <b>71%</b> |           | <b>9%</b> |           | <b>19%</b> |

**3B. Medium (online or offline) and social context of work activities**

(see Supplementary Figure 1, *HEartS Professional Survey*, questions 4.5 and 4.6)

|                                                                          | Pre-COVID-19 |     | Currently |     |
|--------------------------------------------------------------------------|--------------|-----|-----------|-----|
|                                                                          | <i>n</i>     | %   | <i>n</i>  | %   |
| <b>Performing (<i>n</i>=254)</b>                                         |              |     |           |     |
| Online alone                                                             | 6            | 2%  | 78        | 31% |
| Online with others                                                       | 3            | 1%  | 54        | 21% |
| Offline alone                                                            | 20           | 8%  | 104       | 41% |
| Offline with others                                                      | 225          | 89% | 18        | 7%  |
| <b>Conducting / directing / producing (<i>n</i>=89)</b>                  |              |     |           |     |
| Online alone                                                             | 2            | 2%  | 26        | 29% |
| Online with others                                                       | 4            | 5%  | 25        | 28% |
| Offline alone                                                            | 10           | 11% | 33        | 37% |
| Offline with others                                                      | 73           | 82% | 5         | 6%  |
| <b>Teaching / coaching / workshop leading / mentoring (<i>n</i>=233)</b> |              |     |           |     |
| Online alone                                                             | 3            | 1%  | 81        | 35% |
| Online with others                                                       | 10           | 4%  | 113       | 49% |
| Offline alone                                                            | 43           | 19% | 26        | 11% |
| Offline with others                                                      | 177          | 76% | 13        | 6%  |

cont...

|                                                                                | Pre-COVID-19 |     | Currently |     |
|--------------------------------------------------------------------------------|--------------|-----|-----------|-----|
|                                                                                | <i>n</i>     | %   | <i>n</i>  | %   |
| <b>Managing / promoting (<i>n</i>=79)</b>                                      |              |     |           |     |
| Online alone                                                                   | 12           | 15% | 28        | 35% |
| Online with others                                                             | 27           | 34% | 45        | 57% |
| Offline alone                                                                  | 4            | 5%  | 5         | 6%  |
| Offline with others                                                            | 36           | 46% | 1         | 1%  |
| <b>Composing / choreographing / designing / making / writing (<i>n</i>=94)</b> |              |     |           |     |
| Online alone                                                                   | 7            | 7%  | 16        | 17% |
| Online with others                                                             | 3            | 3%  | 10        | 11% |
| Offline alone                                                                  | 69           | 73% | 67        | 71% |
| Offline with others                                                            | 15           | 16% | 1         | 1%  |
| <b>Appraising / assessing / evaluating / reviewing (<i>n</i>=86)</b>           |              |     |           |     |
| Online alone                                                                   | 13           | 15% | 39        | 45% |
| Online with others                                                             | 7            | 8%  | 29        | 34% |
| Offline alone                                                                  | 21           | 24% | 15        | 17% |
| Offline with others                                                            | 45           | 52% | 3         | 4%  |
| <b>Researching (<i>n</i>=83)</b>                                               |              |     |           |     |
| Online alone                                                                   | 35           | 42% | 49        | 59% |
| Online with others                                                             | 7            | 8%  | 14        | 17% |
| Offline alone                                                                  | 33           | 40% | 20        | 24% |
| Offline with others                                                            | 8            | 10% | 0         | 0%  |
| <b>Curating / editing / presenting / technical supporting (<i>n</i>=49)</b>    |              |     |           |     |
| Online alone                                                                   | 5            | 10% | 20        | 41% |
| Online with others                                                             | 8            | 16% | 18        | 37% |
| Offline alone                                                                  | 11           | 22% | 11        | 22% |
| Offline with others                                                            | 25           | 51% | 0         | 0%  |
| <b>Other (<i>n</i>=62)</b>                                                     |              |     |           |     |
| Online alone                                                                   | 6            | 10% | 20        | 32% |
| Online with others                                                             | 11           | 18% | 23        | 37% |
| Offline alone                                                                  | 9            | 15% | 17        | 27% |
| Offline with others                                                            | 36           | 58% | 2         | 3%  |

### 3C. Skill maintenance and development

(see Supplementary Figure 1, *HEartS Professional Survey*, questions 4.7 and 4.8)

| Learning / practising / preparing / reflecting... | individually |     | with others<br>online |     | with others<br>in person |     | overall       |        |
|---------------------------------------------------|--------------|-----|-----------------------|-----|--------------------------|-----|---------------|--------|
|                                                   | <i>n</i>     | %   | <i>n</i>              | %   | <i>n</i>                 | %   | mean <i>n</i> | mean % |
| I haven't done it                                 | 37           | 10% | 104                   | 27% | 242                      | 61% | 127.7         | 33%    |
| Less*                                             | 163          | 42% | 80                    | 21% | 116                      | 30% | 119.7         | 31%    |
| No change                                         | 63           | 16% | 31                    | 8%  | 20                       | 5%  | 38.0          | 10%    |
| More*                                             | 122          | 32% | 170                   | 44% | 7                        | 2%  | 99.7          | 26%    |

### 3D. Changes in socializing

(see Supplementary Figure 1, *HEartS Professional Survey*, questions 3.4 and 3.5)

|               | In person |     | Electronically |     | Total (%) |     |
|---------------|-----------|-----|----------------|-----|-----------|-----|
|               | <i>n</i>  | %   | <i>n</i>       | %   | <i>n</i>  | %   |
| Fewer people* | 366       | 95% | 21             | 6%  | 270       | 70% |
| No change     | 4         | 1%  | 24             | 6%  | 91        | 24% |
| More people*  | 15        | 4%  | 340            | 88% | 24        | 6%  |

### 3E. Changes in finance

(see Supplementary Figure 1, *HEartS Professional Survey*, question 5.6)

|                   | <i>n</i>   | %          |
|-------------------|------------|------------|
| <b>Increase:</b>  | <b>11</b>  | <b>3%</b>  |
| £2000+            | 1          | 0.3%       |
| £1000 – £1999     | 1          | 0.3%       |
| £1 – £999         | 9          | 2%         |
| <b>No change:</b> | <b>82</b>  | <b>21%</b> |
| <b>Decrease:</b>  | <b>292</b> | <b>76%</b> |
| £1 – £999         | 60         | 16%        |
| £1000 – £1999     | 53         | 14%        |
| £2000 – £2999     | 45         | 12%        |
| £3000 – £3999     | 25         | 7%         |
| £4000+            | 109        | 28%        |

### 3F. Financial hardship

(see Supplementary Figure 1, *HEartS Professional Survey*, question 5.7)

|               | <i>n</i>   | %          |
|---------------|------------|------------|
| <b>Yes</b>    | <b>208</b> | <b>54%</b> |
| Yes, a lot    | 58         | 15%        |
| Yes, a little | 145        | 38%        |
| No            | 182        | 47%        |

### 3G. Changes in loneliness and anxiety

(see Supplementary Figure 1, *HEartS Professional Survey*, questions 3.6 and 3.7)

|           | Lonely   |     | Anxious  |     |
|-----------|----------|-----|----------|-----|
|           | <i>n</i> | %   | <i>n</i> | %   |
| More*     | 244      | 63% | 328      | 85% |
| No change | 114      | 30% | 42       | 11% |
| Less*     | 27       | 7%  | 15       | 4%  |

\* For Tables 3A, 3C, and 3E: 'More' includes 'Much more, quite a lot more, and a little more'; 'Less' includes 'Much less, quite a lot less, and a little less'. For Table 3D: 'Fewer people' includes 'Substantially fewer people, far fewer people, and fewer people'; 'More people' includes 'Substantially more people, far more people, and more people'.
